# Supplementary material for: Fabrication of active Cu–Zn nanoalloys on H-ZSM5 zeolite for enhanced dimethyl ether synthesis via syngas
Source: Royal Society of Chemistry journal article supplement (doi:10.1039/c3ta14936f), 2014-01-01
Supplement: c3ta14936f1.pdf [file c3ta14936f1.pdf]

## Electronic Supplementary Information (ESI)

### Fabrication of Active Cu-Zn Nanoalloys on H-ZSM5 Zeolite for Enhanced Dimethyl Ether Synthesis via Syngas

Jian Sun <sup>a</sup>, Guohui Yang <sup>a</sup>, Qingxiang Ma <sup>a</sup>, Issei Ooki <sup>a</sup>, Akira Taguchi <sup>b</sup>, Takayuki Abe <sup>b</sup>, Qing Xie <sup>c</sup>, Yoshiharu Yoneyama <sup>a</sup>, and Noritatsu Tsubaki <sup>a,d\*</sup>

<sup>a</sup> Department of Applied Chemistry, School of Engineering, University of Toyama, Gofuku 3190, Toyama 930-8555, Japan

<sup>b</sup> Hydrogen Isotope Research Center, University of Toyama, Gofuku 3190, Toyama 930-8555, Japan

<sup>c</sup> Key Laboratory of Industrial Ecology and Environmental Engineering (MOE), School of Environmental Science and Technology, Dalian University of Technology, Dalian 116024, P. R. China

<sup>d</sup> Japan Science and Technology Agency (JST), ACT-C, 4-1-8 Honcho, Kawaguchi, Saitama 332-0012, Japan

#### 1. Details of experimental section

*In situ* diffuse reflectance infrared Fourier transform spectra (DRIFTS) were conducted on Nicolet Nexus 470 FTIR spectrometer with a diffuse reflectance attachment and MCT detector. ZnSe window was used for the *in situ* infrared cell. The absorbance spectra were collected for 32 scans with a resolution of 2 cm<sup>-1</sup>. Prior to CO adsorption, catalyst of about 0.015 g was heated to the corresponding reduction temperature with a He flow (99.99%) of 30 mL·min<sup>-1</sup>. After sweeping for 1h, a pure H<sub>2</sub> flow (99.99%) of 30 mL·min<sup>-1</sup> was introduced instead of He to reduce the catalyst for 1h. Subsequently, a pure He was flowed into the cell for 4 h to remove H<sub>2</sub> residual in cell and adsorbed on the catalyst, followed by cooling down the temperature to 50°C. After keeping for 0.5 h, the background spectra under this condition were recorded. Then, pure CO flow (99.99%) of 30 mL·min<sup>-1</sup> was introduced into the IR cell for 0.5 h at 50°C. After adsorption, He flow of 50 mL·min<sup>-1</sup> was employed to sweep for 2 h,

followed by obtaining desorption spectra of CO desorption.

H<sub>2</sub> temperature-programmed reduction (H<sub>2</sub>-TPR) for the reduced catalysts and N<sub>2</sub>O-pulse experiment were performed with an in situ reduction procedure at corresponding temperature prior to the common tests. Samples used in this experiment were CZ-S and CZ-I. H<sub>2</sub>-TPR was performed by using Catalyst Analyzer BELCAT-B-TT (Nippon Bel Co.) The catalyst was heated to 150°C for 1 h in an Ar flow prior to the following test. Samples needing in situ reduction continued to be heated to corresponding temperature, followed by cooling down to 50°C in a Ar flow. Then, TCD signals were recorded at 5% H<sub>2</sub> (Ar balance) flow with a heating rate of 10°C·min<sup>-1</sup>.

NH<sub>3</sub>-TPD was performed using the same equipment as in H<sub>2</sub>-TPR. Samples were pretreated at 150°C in a He flow followed by cooling down to 80°C. A flow of 5% NH<sub>3</sub> (He balance) was introduced at a rate of 30 mL·min<sup>-1</sup> for 0.5 h. Then, sweeping by He until a constant TCD signal was conducted. Desorption curves of NH<sub>3</sub> were recorded with a heating rate of 10°C·min<sup>-1</sup>.

## 2. Acidic sites distribution of prepared catalysts and H-ZSM5

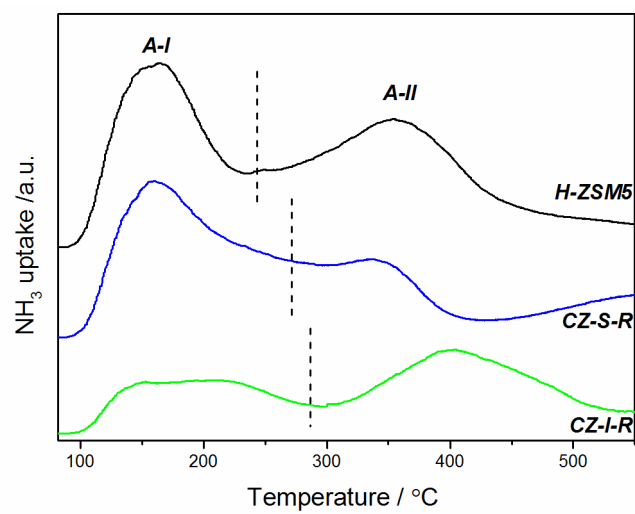

*Figure S1* NH<sub>3</sub>-TPD curves of prepared catalysts and H-ZSM5 zeolite.
